# Supplementary material for: A question of time and space: A model approach to the synchronicity of gypsum and halite during the Messinian Salinity Crisis
Source: Copernicus journal article supplement (doi:10.5194/cp-2024-58), 2024-09-10
Supplement: Supplementary file 1 [file cp-2024-58-supplement.pdf]

# A question of time and space

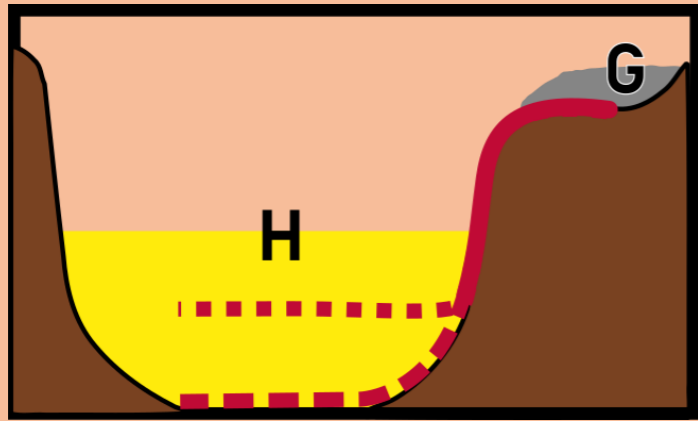

Synchronicity of gypsum and halite during the Messinian Salinity Crisis?

The explored configurations lead to different outcomes

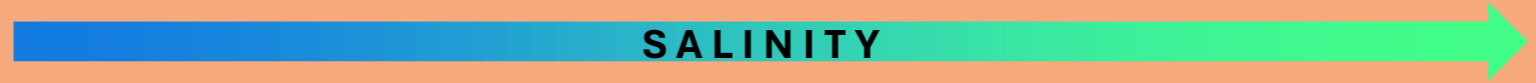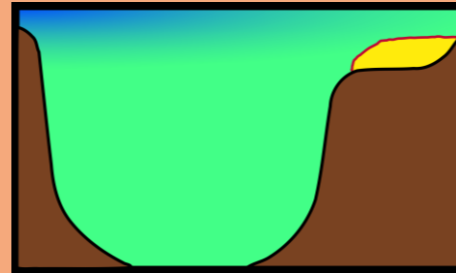

halite forms only in restricted margins

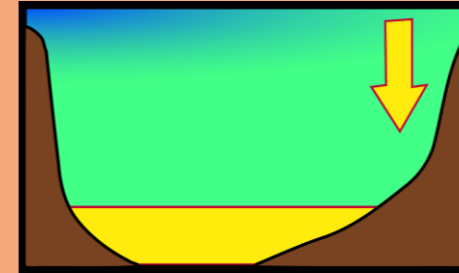

average salinity close to halite saturation

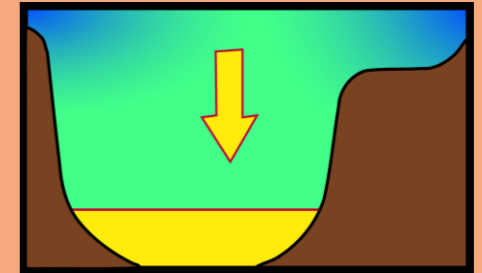

gypsum forms in freshened margin at very low rate
